# Supplementary material
Source: PubMed Central journal article supplement (PMC4028149)
Supplement: NIHMS404150-supplement-1_si_001.pdf [file NIHMS404150-supplement-1_si_001.pdf]

## Supplementary material

Supplementary table 1. Metabolites observed in significantly different concentrations in urine samples obtained from slc26a6 null mice compared with wild-type control mice.

| Metabolite                                                      | Chemical Shift. ppm | NMR RHO | NMR pval | CE_Variable | CE RHO | CE pval  |
|-----------------------------------------------------------------|---------------------|---------|----------|-------------|--------|----------|
| <b>METABOLITES POSITIVELY ASSOCIATED WITH SLC26A6-null MICE</b> |                     |         |          |             |        |          |
| <i>m</i> -hppasulphate **                                       | 7.38(t)             | 0.662   | 2.03E-03 | Var_6718    | 0.817  | 1.93E-05 |
|                                                                 | 7.21(m)             | 0.817   | 1.93E-05 |             |        |          |
|                                                                 | 2.91(t)             | 0.817   | 1.93E-05 |             |        |          |
|                                                                 | 2.51(t)             | 0.817   | 1.93E-05 |             |        |          |
|                                                                 | 7.16(dd)            | 0.817   | 1.93E-05 |             |        |          |
| Scyllo inositol                                                 | 3.36(s)             | 0.428   | 6.74E-02 |             |        |          |
| TMAO **                                                         | 3.27(s)             | 0.292   | 2.25E-01 |             |        |          |
| Creatine **                                                     | 3.04(s)             | 0.448   | 5.46E-02 | Var_3587    | 0.428  | 6.74E-02 |
|                                                                 | 3.93(s)             | 0.214   | 3.79E-01 |             |        |          |
| Lactate                                                         | 1.33(d)             | 0.701   | 8.34E-04 |             |        |          |
| Glycerolphosphorylcholine                                       | 3.23 (s)            | 0.817   | 1.93E-05 |             |        |          |
| Alanine *                                                       | 1.48 (d)            | 0.214   | 3.79E-01 |             |        |          |
| Oxalate                                                         |                     |         |          | Var_5727    | 0.701  | 8.34E-04 |
| Chlorides                                                       |                     |         |          | Var_5164    | 0.467  | 4.38E-02 |
| Allantoin **                                                    |                     |         |          | Var_2122    | 0.428  | 6.74E-02 |
| Glycolate                                                       |                     |         |          | Var_7036    | 0.37   | 1.19E-01 |
| Uric/inosine *                                                  |                     |         |          | Var_2910    | 0.214  | 3.79E-01 |
| <b>METABOLITES NEGATIVELY ASSOCIATED WITH SLC26A6-null MICE</b> |                     |         |          |             |        |          |
| Hippurate                                                       | 7.84(d)             | -0.856  | 2.89E-06 | Var_2220    | -0.72  | 5.07E-04 |
|                                                                 | 7.64(t)             | -0.856  | 2.89E-06 |             |        |          |
|                                                                 | 7.56(t)             | -0.856  | 2.89E-06 | Var_9726    | -0.701 | 8.34E-04 |
|                                                                 | 3.97(d)             | -0.856  | 2.89E-06 |             |        |          |
| Taurine                                                         | 3.43(t)             | -0.35   | 1.41E-01 |             |        |          |
|                                                                 | 3.27 (t)            | -0.545  | 1.58E-02 |             |        |          |
| TMA *                                                           | 2.88(s)             | -0.428  | 6.74E-02 |             |        |          |
| Succinate                                                       | 2.41(s)             | -0.35   | 1.41E-01 |             |        |          |
| Methionine *                                                    | 2.14(s)             | -0.195  | 4.25E-01 |             |        |          |
| Citrate                                                         | 2.68(d)             | -0.331  | 1.66E-01 | Var_6653    | -0.291 | 2.25E-01 |
|                                                                 | 2.54 (d)            | -0.545  | 1.58E-02 |             |        |          |

\* Metabolites positively associated with male. \*\* Metabolites positively associated with female

Supplementary table 2. The changes of metabolites observed in urines obtained from female mice compared with male mice.

| Metabolite                                           | Chemical Shift. ppm | NMR RHO | NMR pval | CE_Variable | CE RHO | CE pval  |
|------------------------------------------------------|---------------------|---------|----------|-------------|--------|----------|
| <b>METABOLITES NEGATIVELY ASSOCIATED WITH FEMALE</b> |                     |         |          |             |        |          |
| TMA                                                  | 2.88(s)             | 0.856   | 2.89E-06 |             |        |          |
| Alanine                                              | 1.48(d)             | 0.778   | 8.64E-05 |             |        |          |
| Methionine                                           | 2.15(s)             | 0.058   | 8.12E-01 |             |        |          |
| Urea                                                 |                     |         |          | Var_340     | 0.058  | 8.12E-01 |
| Phenylalanine                                        |                     |         |          | Var_1338    | 0.058  | 8.12E-01 |
| PAG                                                  | 3.68(s)             | 0.856   | 2.89E-06 | Var_2057    | 0.058  | 8.12E-01 |
|                                                      | 7.35 (m)            | 0.856   | 2.89E-06 |             |        |          |
|                                                      | 7.43 (m)            | 0.856   | 2.89E-06 |             |        |          |
| Uridine                                              |                     |         |          | Var_2286    | 0.097  | 6.92E-01 |
| Uric/ inosine                                        |                     |         |          | Var_2910    | 0.039  | 8.74E-01 |
| Spermine                                             | 3.12 (m)            | 0.856   | 2.89E-06 |             |        |          |
|                                                      | 2.13 (m)            | 0.856   | 2.89E-06 |             |        |          |
| <b>METABOLITES POSITIVELY ASSOCIATED WITH FEMALE</b> |                     |         |          |             |        |          |
| <i>m</i> -hppasulphate                               | 7.38(t)             | 0.778   | 8.64E-05 | Var_6718    | -0.039 | 8.74E-01 |
|                                                      | 7.21(m)             | 0.72    | 5.07E-04 |             |        |          |
|                                                      | 2.91(t)             | 0.448   | 5.46E-02 |             |        |          |
|                                                      | 2.51(t)             | 0.817   | 1.93E-05 |             |        |          |
|                                                      | 7.16(dd)            | 0.545   | 1.58E-02 |             |        |          |
| Formate                                              | 8.46(s)             | 0.817   | 1.93E-05 |             |        |          |
| TMAO                                                 | 3.27(s)             | 0.856   | 2.89E-06 |             |        |          |
| Creatine                                             | 3.04(s)             | 0.642   | 3.03E-03 | Var_3587    | 0.545  | 1.58E-02 |
|                                                      | 3.93(s)             | 0.759   | 1.64E-04 |             |        |          |
| Creatinine                                           | 3.045(s)            | 0.856   | 2.89E-06 | Var_3598    | 0.136  | 5.78E-01 |
|                                                      | 4.05(s)             | 0.856   | 2.89E-06 |             |        |          |
| 2-oxoisocaproate                                     | 0.94(d)             | 0.856   | 2.89E-06 |             |        |          |
| 3-methyl-                                            | 1.11(d)             | 0.117   | 6.34E-01 |             |        |          |

|                   |          |       |          |          |       |          |
|-------------------|----------|-------|----------|----------|-------|----------|
| 2oxoisovalerate   | 0.90 (t) | 0.856 | 2.89E-06 |          |       |          |
| Glycerate         | 3.83(dd) | 0.856 | 2.89E-06 |          |       |          |
| Allantoin *       |          |       |          | Var_2120 | 0.117 | 6.34E-01 |
| Guanidino acetate | 3.86(s)  | 0.856 | 2.89E-06 |          |       |          |
| Methyl malonate   | 1.25(d)  | 0.72  | 5.07E-04 |          |       |          |

\* Allantoin signals appear in the region, corresponding to water and urea resonances ( $\delta$  4.5-6.5), has been removed

Supplementary table 3. Summary of the metabolites that are positively and negatively associated with Oxalate (variable 5727), based on Pearson correlation.

| Metabolite             | Chemical Shift. ppm | Correlation coefficient <i>r</i> | pval     | CE_Variable | Correlation coefficient <i>r</i> | pval        |
|------------------------|---------------------|----------------------------------|----------|-------------|----------------------------------|-------------|
| <i>m</i> -hppasulphate | 7.38(t)             | 0.497                            | 3.03E-02 | Var_6718    | 0.886                            | 4.93 E -007 |
|                        | 7.21(m)             | 0.559                            | 1.90E-02 |             |                                  |             |
|                        | 2.91(t)             | 0.561                            | 1.63E-02 |             |                                  |             |
|                        | 2.51(t)             | 0.563                            | 1.21E-02 |             |                                  |             |
|                        | 7.16(dd)            | 0.6                              | 3.23E-02 |             |                                  |             |
| TMAO                   | 3.27(s)             | 0.6                              | 5.61E-03 |             |                                  |             |
| Lactate                | 1.33(d)             | 0.61                             | 5.86E-03 |             |                                  |             |
| Chlorides              |                     |                                  |          | Var_5164    | 0.549                            | 2.46E-03    |
| Nitrate                |                     |                                  |          | Var_5228    | 0.718                            | 1.86E-03    |
| Oxalate *              |                     |                                  |          | Var_5727 *  | 1                                | 0.00E+00    |
| Fumarate               |                     |                                  |          | Var_6168    | 0.58                             | 4.07E-03    |
| 2-oxoglutarate         |                     |                                  |          | Var_6308    | 0.619                            | 4.07E-03    |
| Glutamate              |                     |                                  |          | Var_6528    | 0.73                             | 1.06E-03    |
| Citrate                |                     |                                  |          | Var_6628    | 0.757                            | 3.00E-04    |
| Glycolate              |                     |                                  |          | Var_7038    | 0.825                            | 4.09E-05    |
| Benzoate/<br>Glycerate |                     |                                  |          | Var_8968    | 0.64                             | 1.61E-02    |
| Hippurate              | 7.84(d)             | -0.599                           | -0.762   | Var_2220    | -0.762                           | 0.000159    |
|                        | 7.64(t)             | -0.595                           | -0.723   |             |                                  |             |
|                        | 7.56(t)             | -0.596                           | -0.701   | Var_9726    | -0.701                           | 0.0175      |
|                        | 3.97(d)             | -0.6                             | 6.63E-03 |             |                                  |             |
| Taurine                | 3.43(t)             | -0.49                            | 4.40E-02 |             |                                  |             |
|                        | 3.27 (t)            | -0.516                           | 1.97E-02 |             |                                  |             |

\* Variable selected for driving the correlation from.

Supplementary table 4. Summary of the metabolites that are positively and negatively associated with m-HPPS (2.51 (t) ppm) based on Pearson correlation.

| Metabolite                                 | Chemical Shift. ppm | Correlation coefficient <i>r</i> | pval     | CE_Variable | Correlation coefficient <i>r</i> | pval        |
|--------------------------------------------|---------------------|----------------------------------|----------|-------------|----------------------------------|-------------|
| <i>m</i> -hppasulphate *                   | 7.38(t)             | 0.959                            | 7.36E-11 | Var_6718    | 0.751                            | 0.000000494 |
|                                            | 7.21(m)             | 0.987                            | 2.44E-15 |             |                                  |             |
|                                            | 2.91(t)             | 0.995                            | 0.00E+00 |             |                                  |             |
|                                            | 2.51(t)*            | 1                                | 0.00E+00 |             |                                  |             |
|                                            | 7.16(dd)            | 0.988                            | 2.88E-15 |             |                                  |             |
| TMAO                                       | 3.27(s)             | 0.629                            | 3.90E-03 |             |                                  |             |
| Creatine                                   | 3.04(s)             | 0.687                            | 9.70E-03 |             |                                  |             |
|                                            | 3.93(s)             | 0.573                            | 1.28E-02 |             |                                  |             |
| Creatinine                                 | 3.045(s)            | 0.738                            | 3.10E-04 |             |                                  |             |
|                                            | 4.05(s)             | 0.753                            | 2.00E-04 |             |                                  |             |
| Scyllo inositol                            | 3.37(s)             | 0.492                            | 1.98E-02 |             |                                  |             |
| $\alpha$ -Ketoisocaproate                  | 0.94(d)             | 0.535                            | 1.84E-02 |             |                                  |             |
|                                            | 2.62(d)             | 0.655                            | 2.36E-03 |             |                                  |             |
| Methylmalonate                             | 1.25(d)             | 0.734                            | 3.40E-04 |             |                                  |             |
| $\alpha$ -Keto- $\beta$ -methyl-N-valerate | 1.11(d)             | 0.573                            | 1.03E-02 |             |                                  |             |
| Indoxylsulphate                            | 7.71(d)             | 0.661                            | 2.00E-03 |             |                                  |             |
|                                            | 7.50(d)             | 0.673                            | 1.58E-03 |             |                                  |             |
|                                            | 7.36(s)             | 0.576                            | 6.01E-03 |             |                                  |             |
| Chlorides                                  |                     |                                  |          | Var_5164    | 0.178                            | 2.28E-02    |
| Oxalate                                    |                     |                                  |          | Var_5727    | 0.483                            | 3.63E-02    |
| Hippurate                                  | 7.84(d)             | -0.693                           | 4.50E-04 | Var_2220    | -0.739                           | 4.60E-04    |
|                                            | 7.64(t)             | -0.669                           | 1.74E-03 |             |                                  |             |
|                                            | 7.56(t)             | -0.666                           | 1.90E-03 | Var_9726    | -0.76                            | 4.60E-04    |
|                                            | 3.97(d)             | -0.592                           | 7.54E-03 |             |                                  |             |
| TMA                                        | 2.88 (s)            | -0.649                           | 2.62E-03 |             |                                  |             |
| Methionine                                 | 2.14(s)             | -0.564                           | 1.79E-02 |             |                                  |             |

\* Variable selected for driving the correlation from
